# Supplementary figures and images for: TALEN-Mediated Inactivation of PD-1 in Tumor-Reactive Lymphocytes Promotes Intratumoral T-cell Persistence and Rejection of Established Tumors
Source: Oxford University Press journal article supplement (doi:10.1158/0008-5472.can-15-3352), 2016-04-14

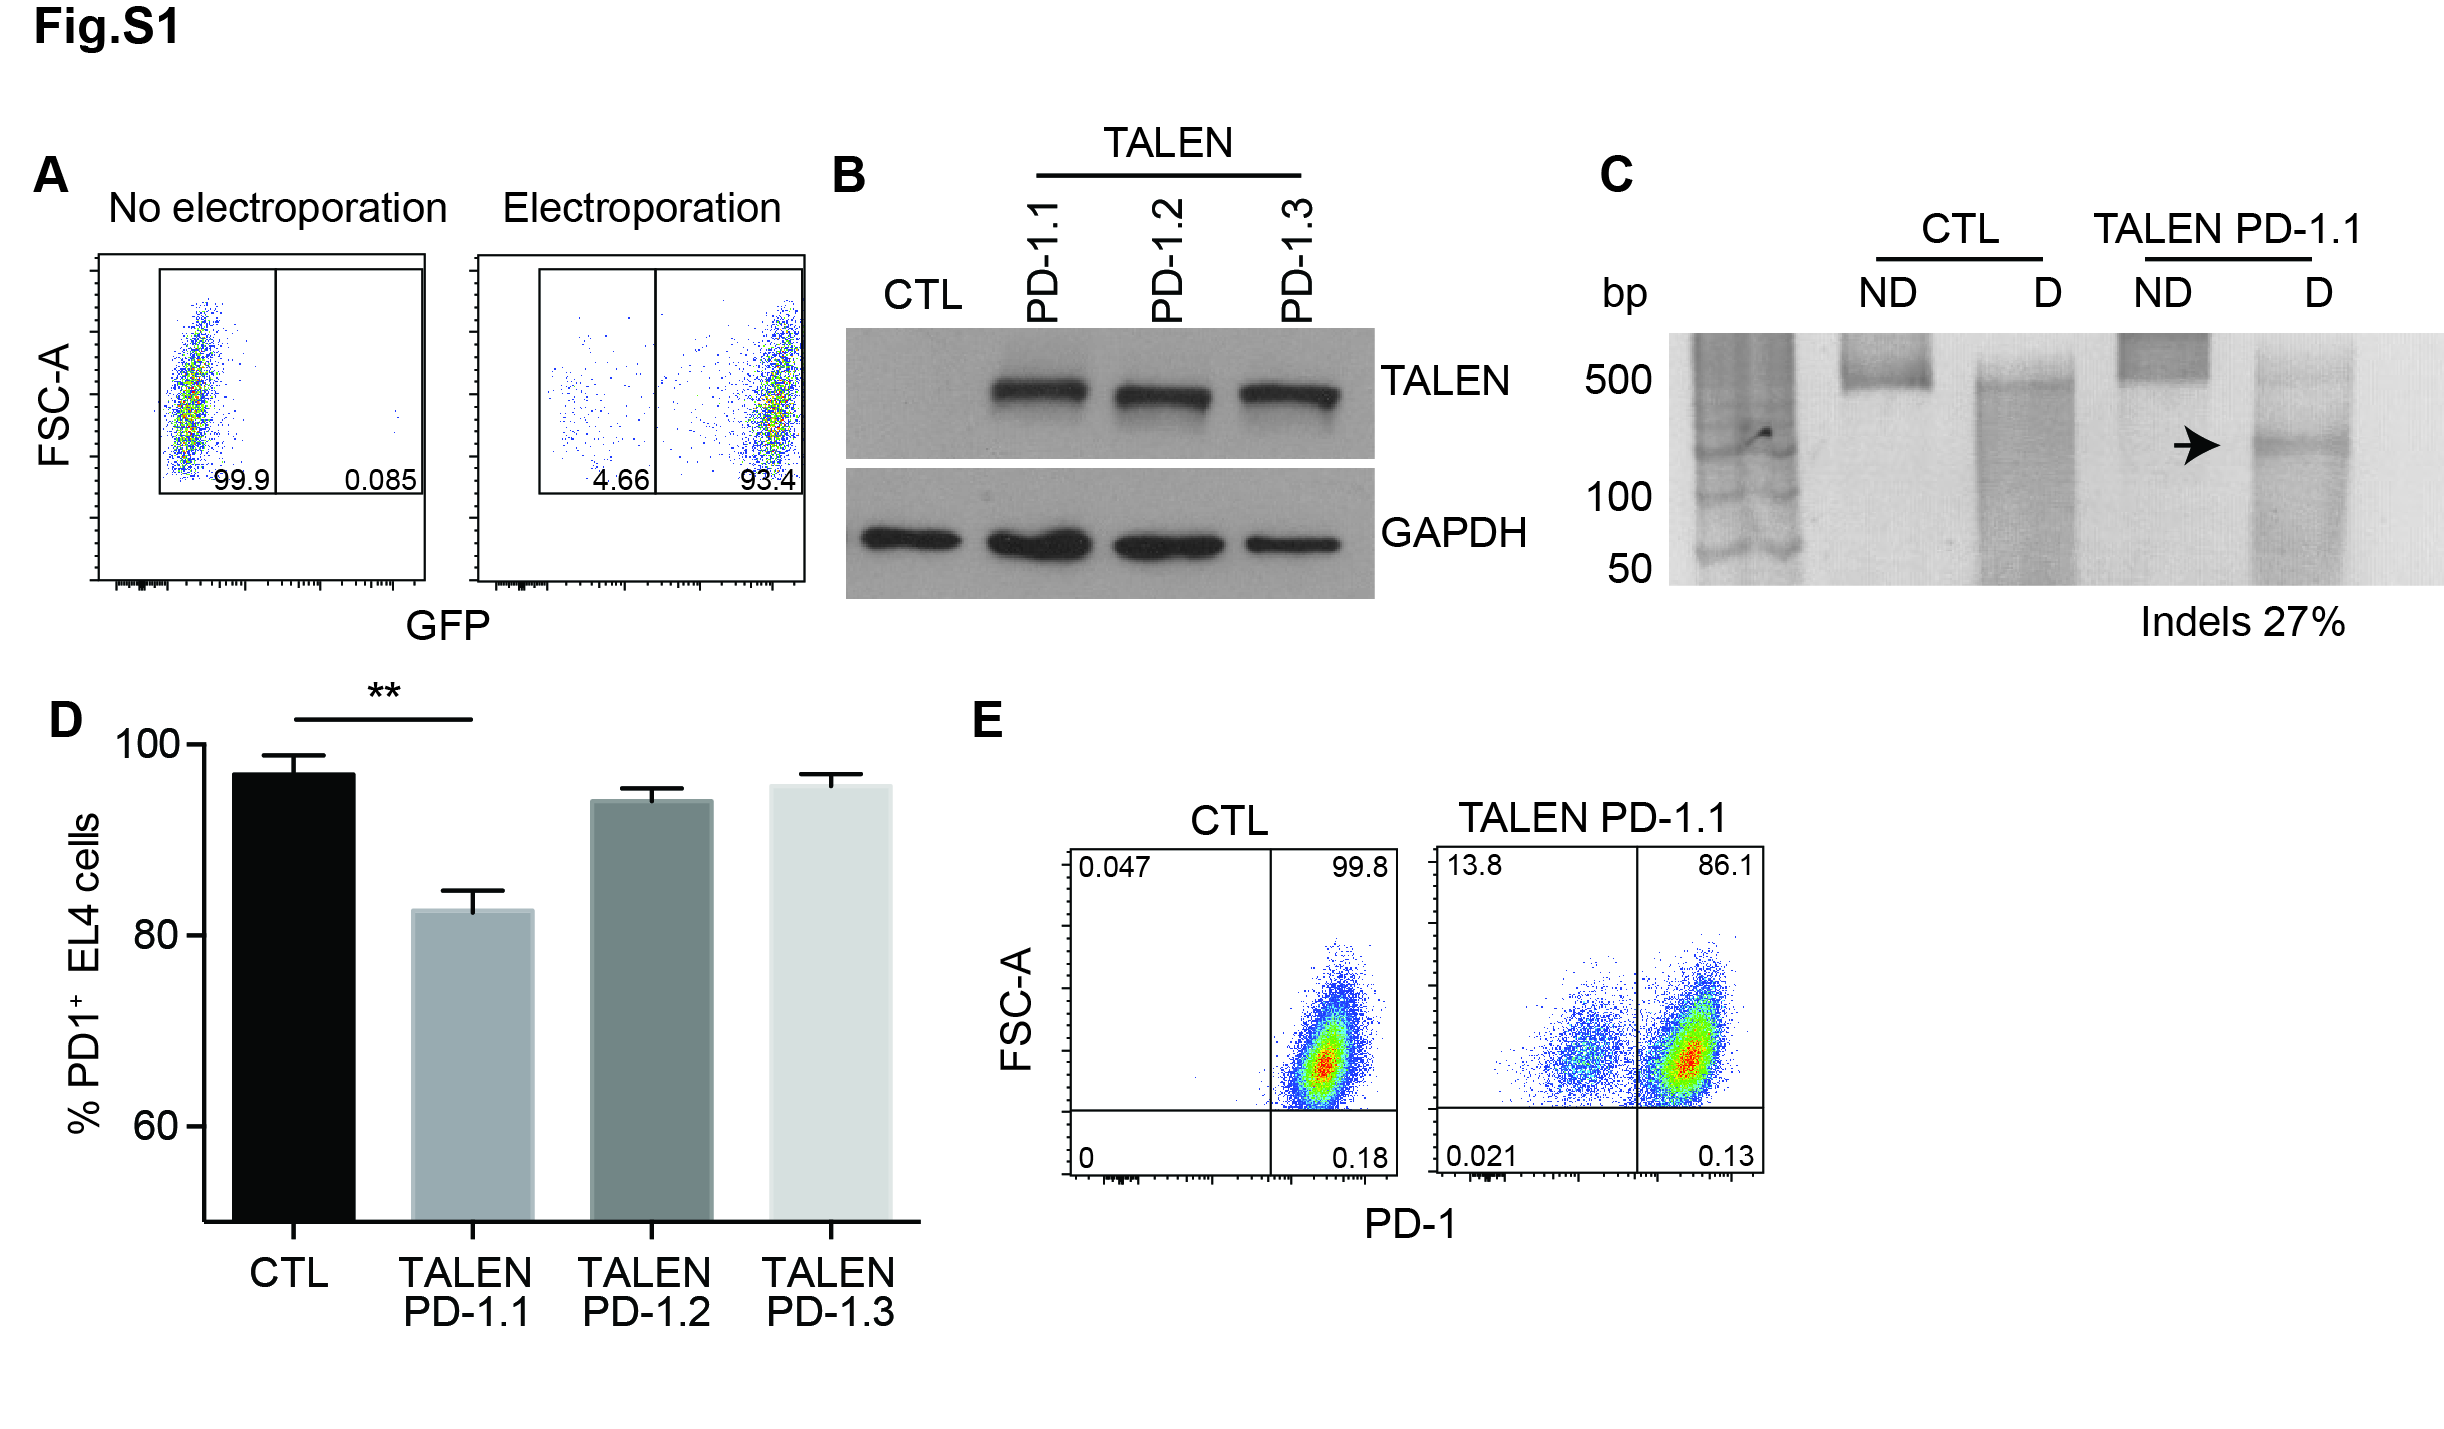


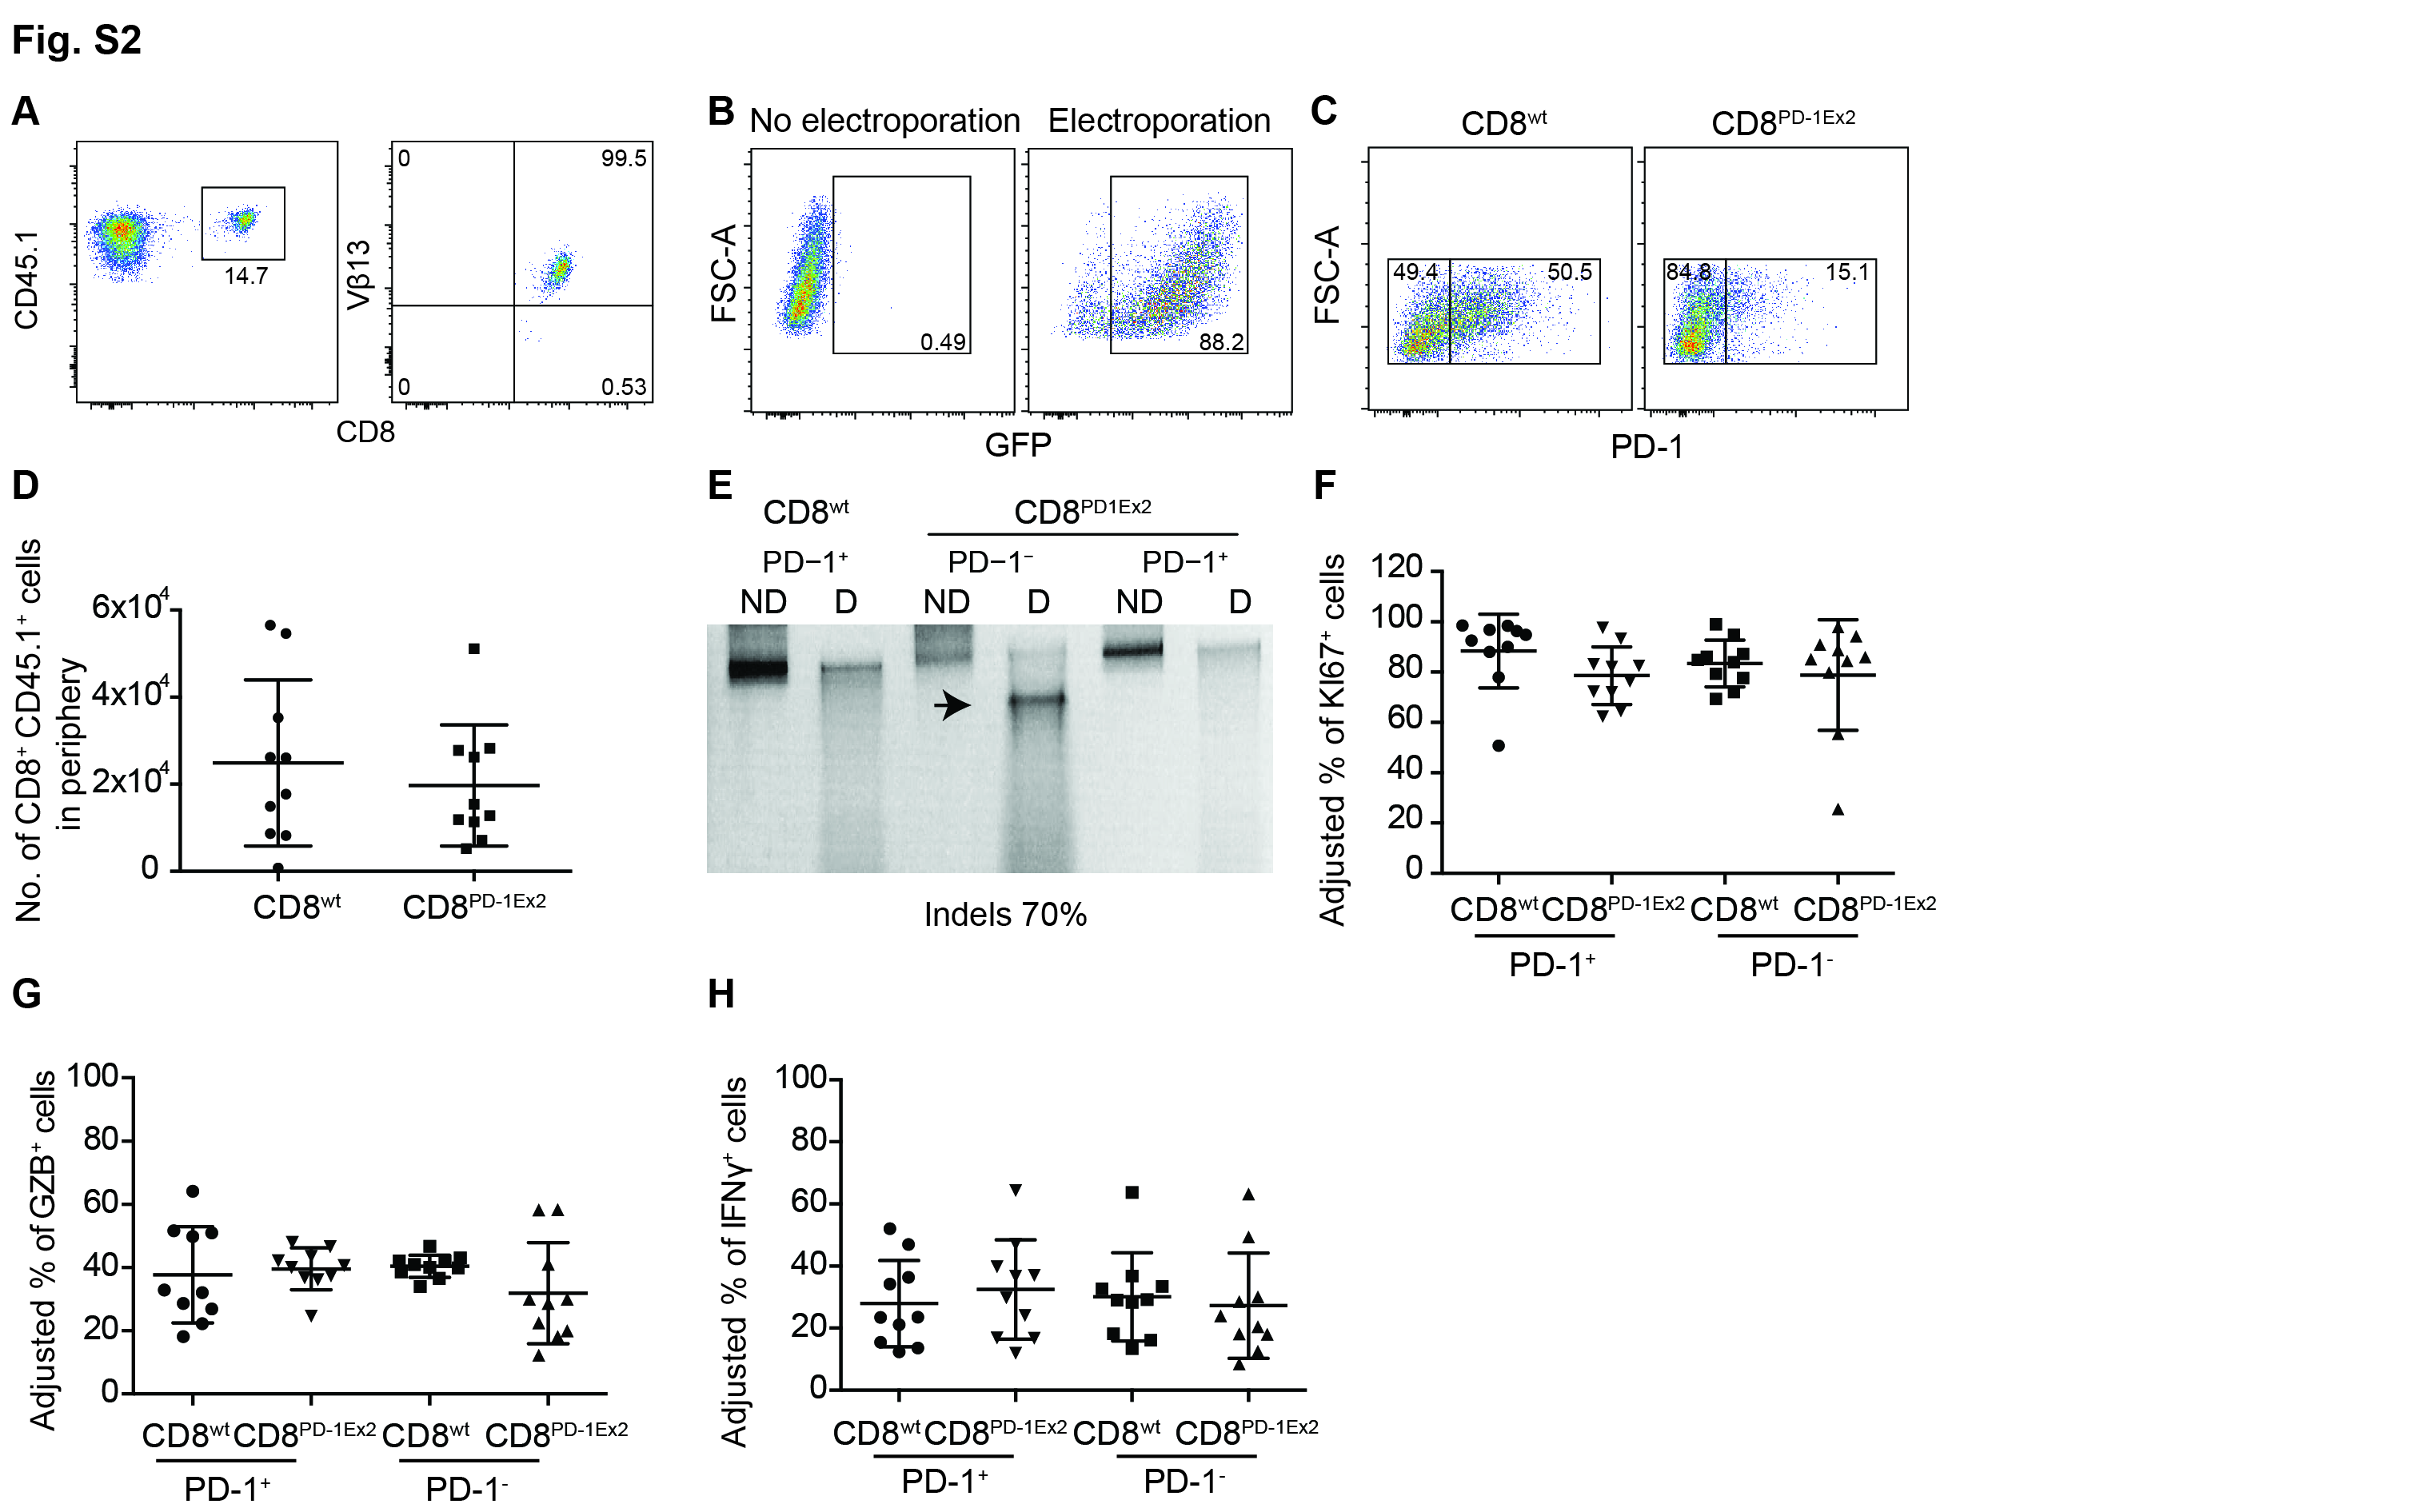


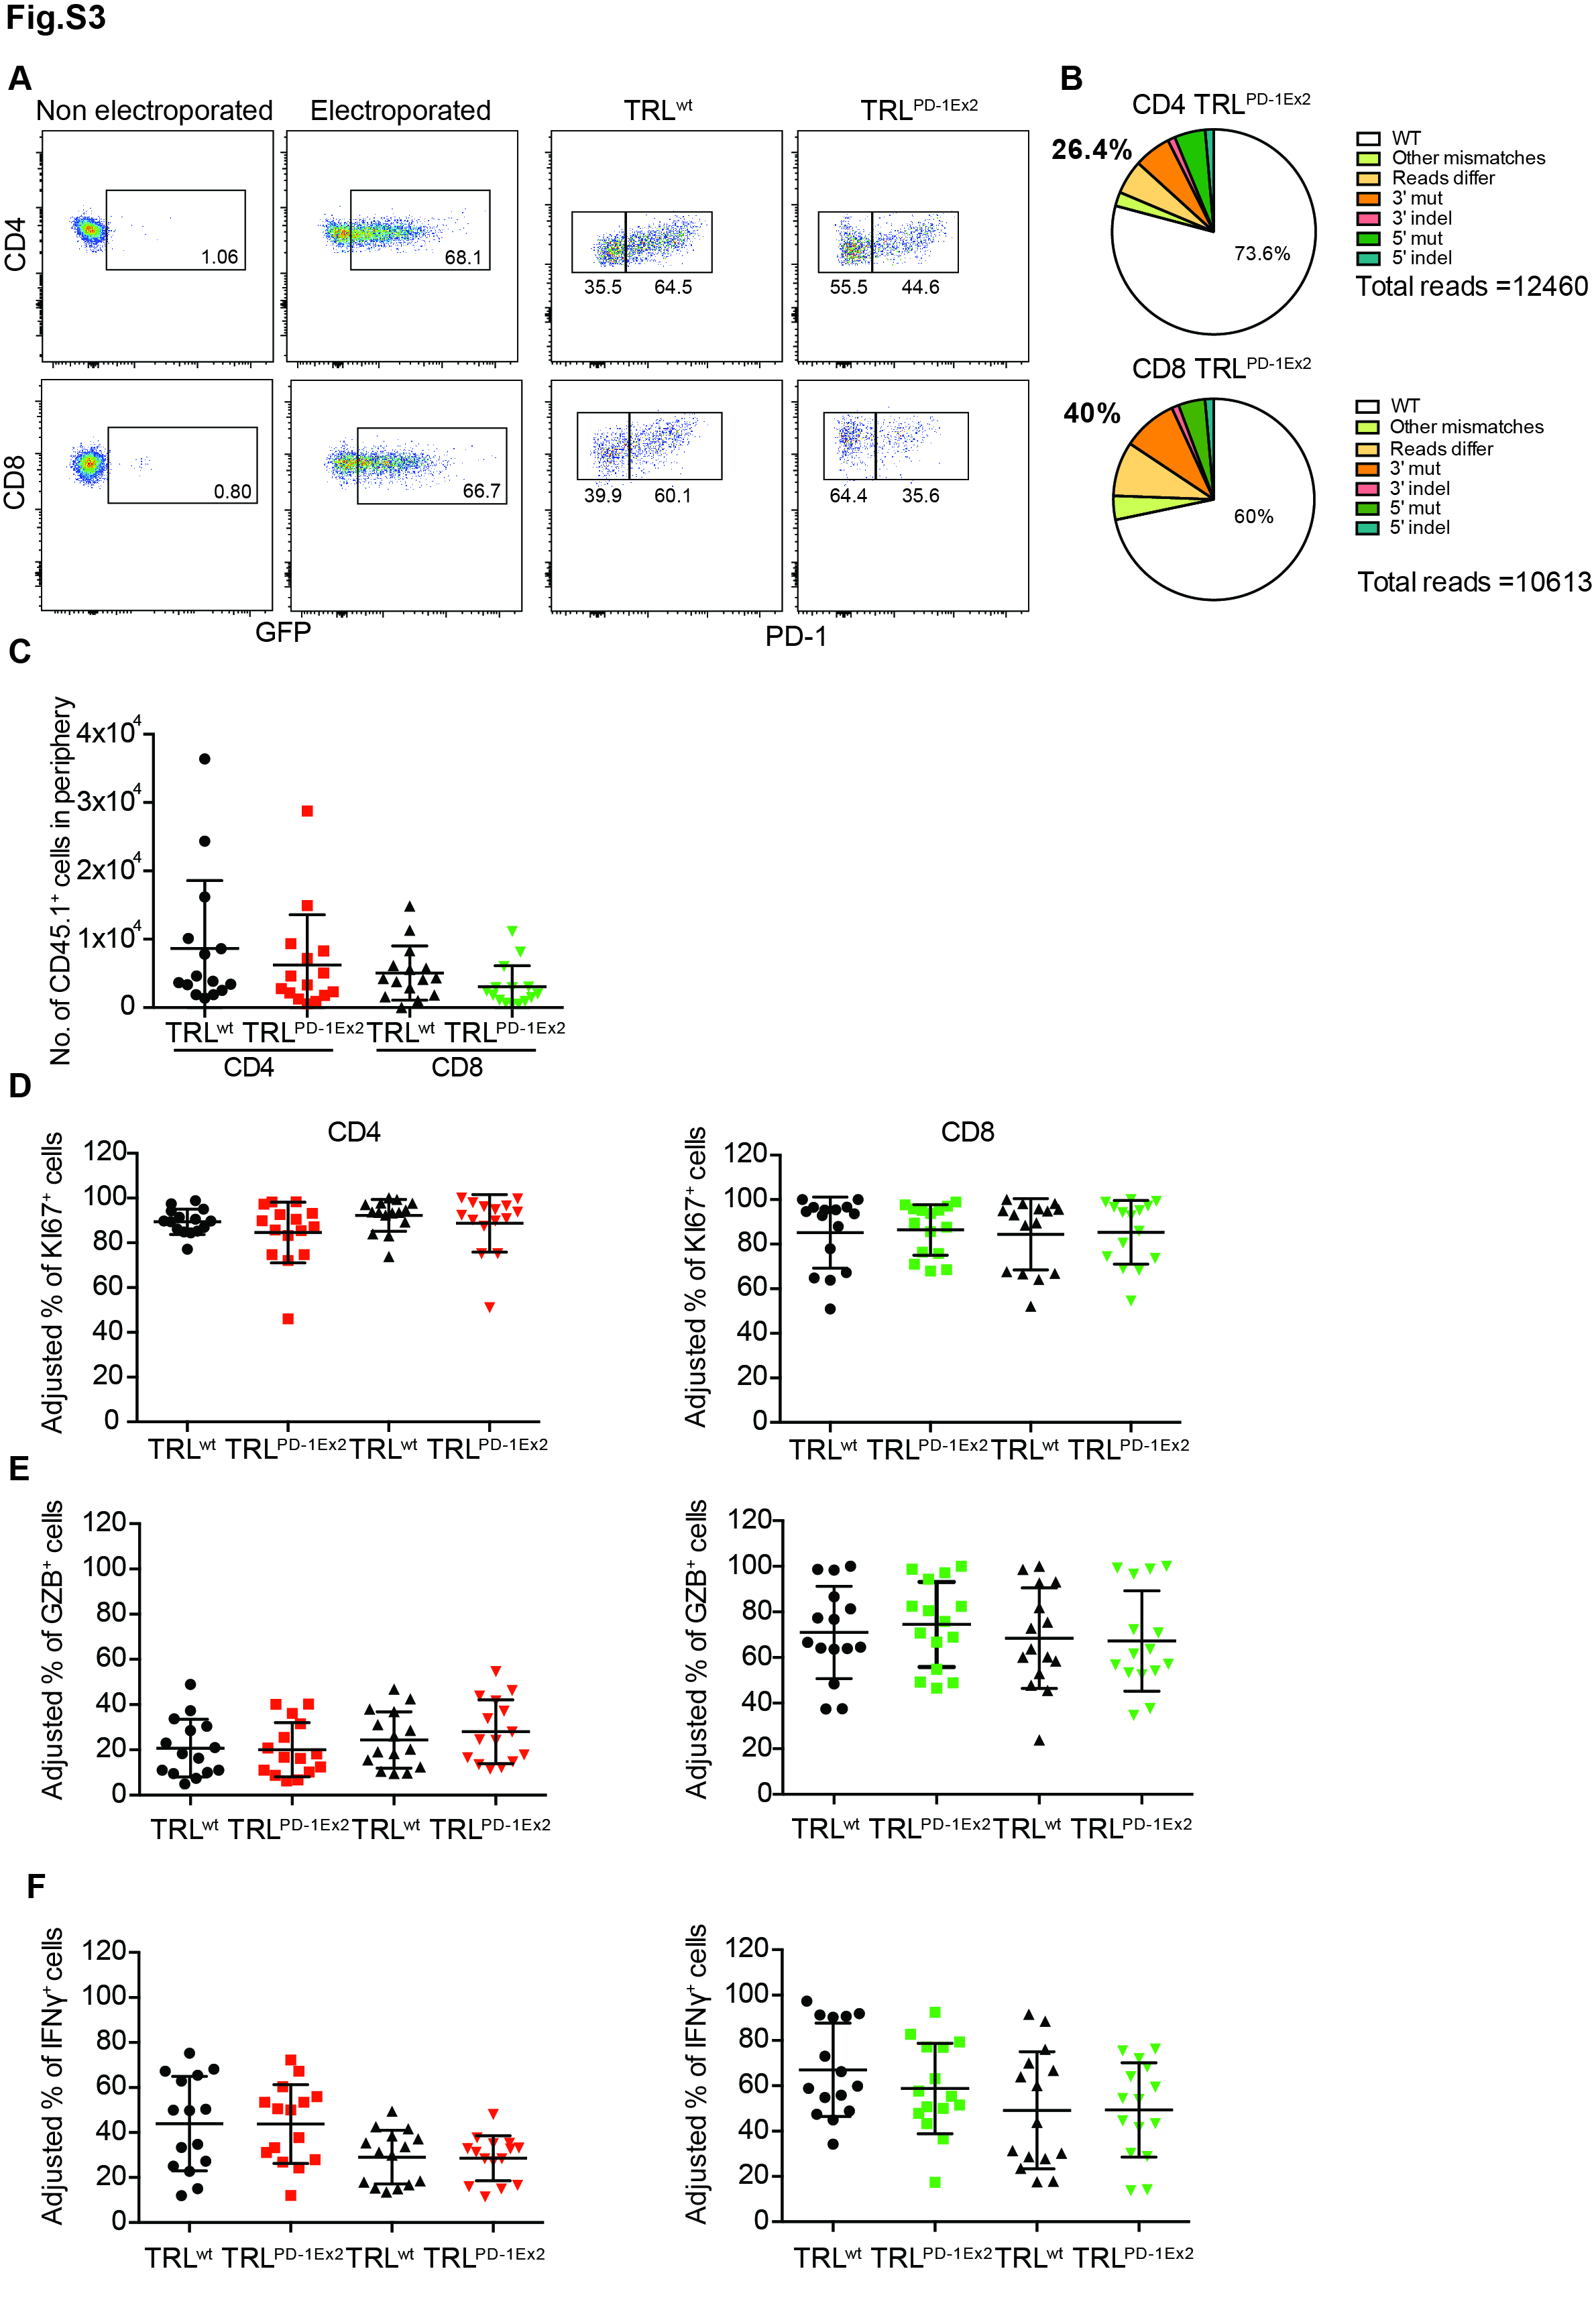


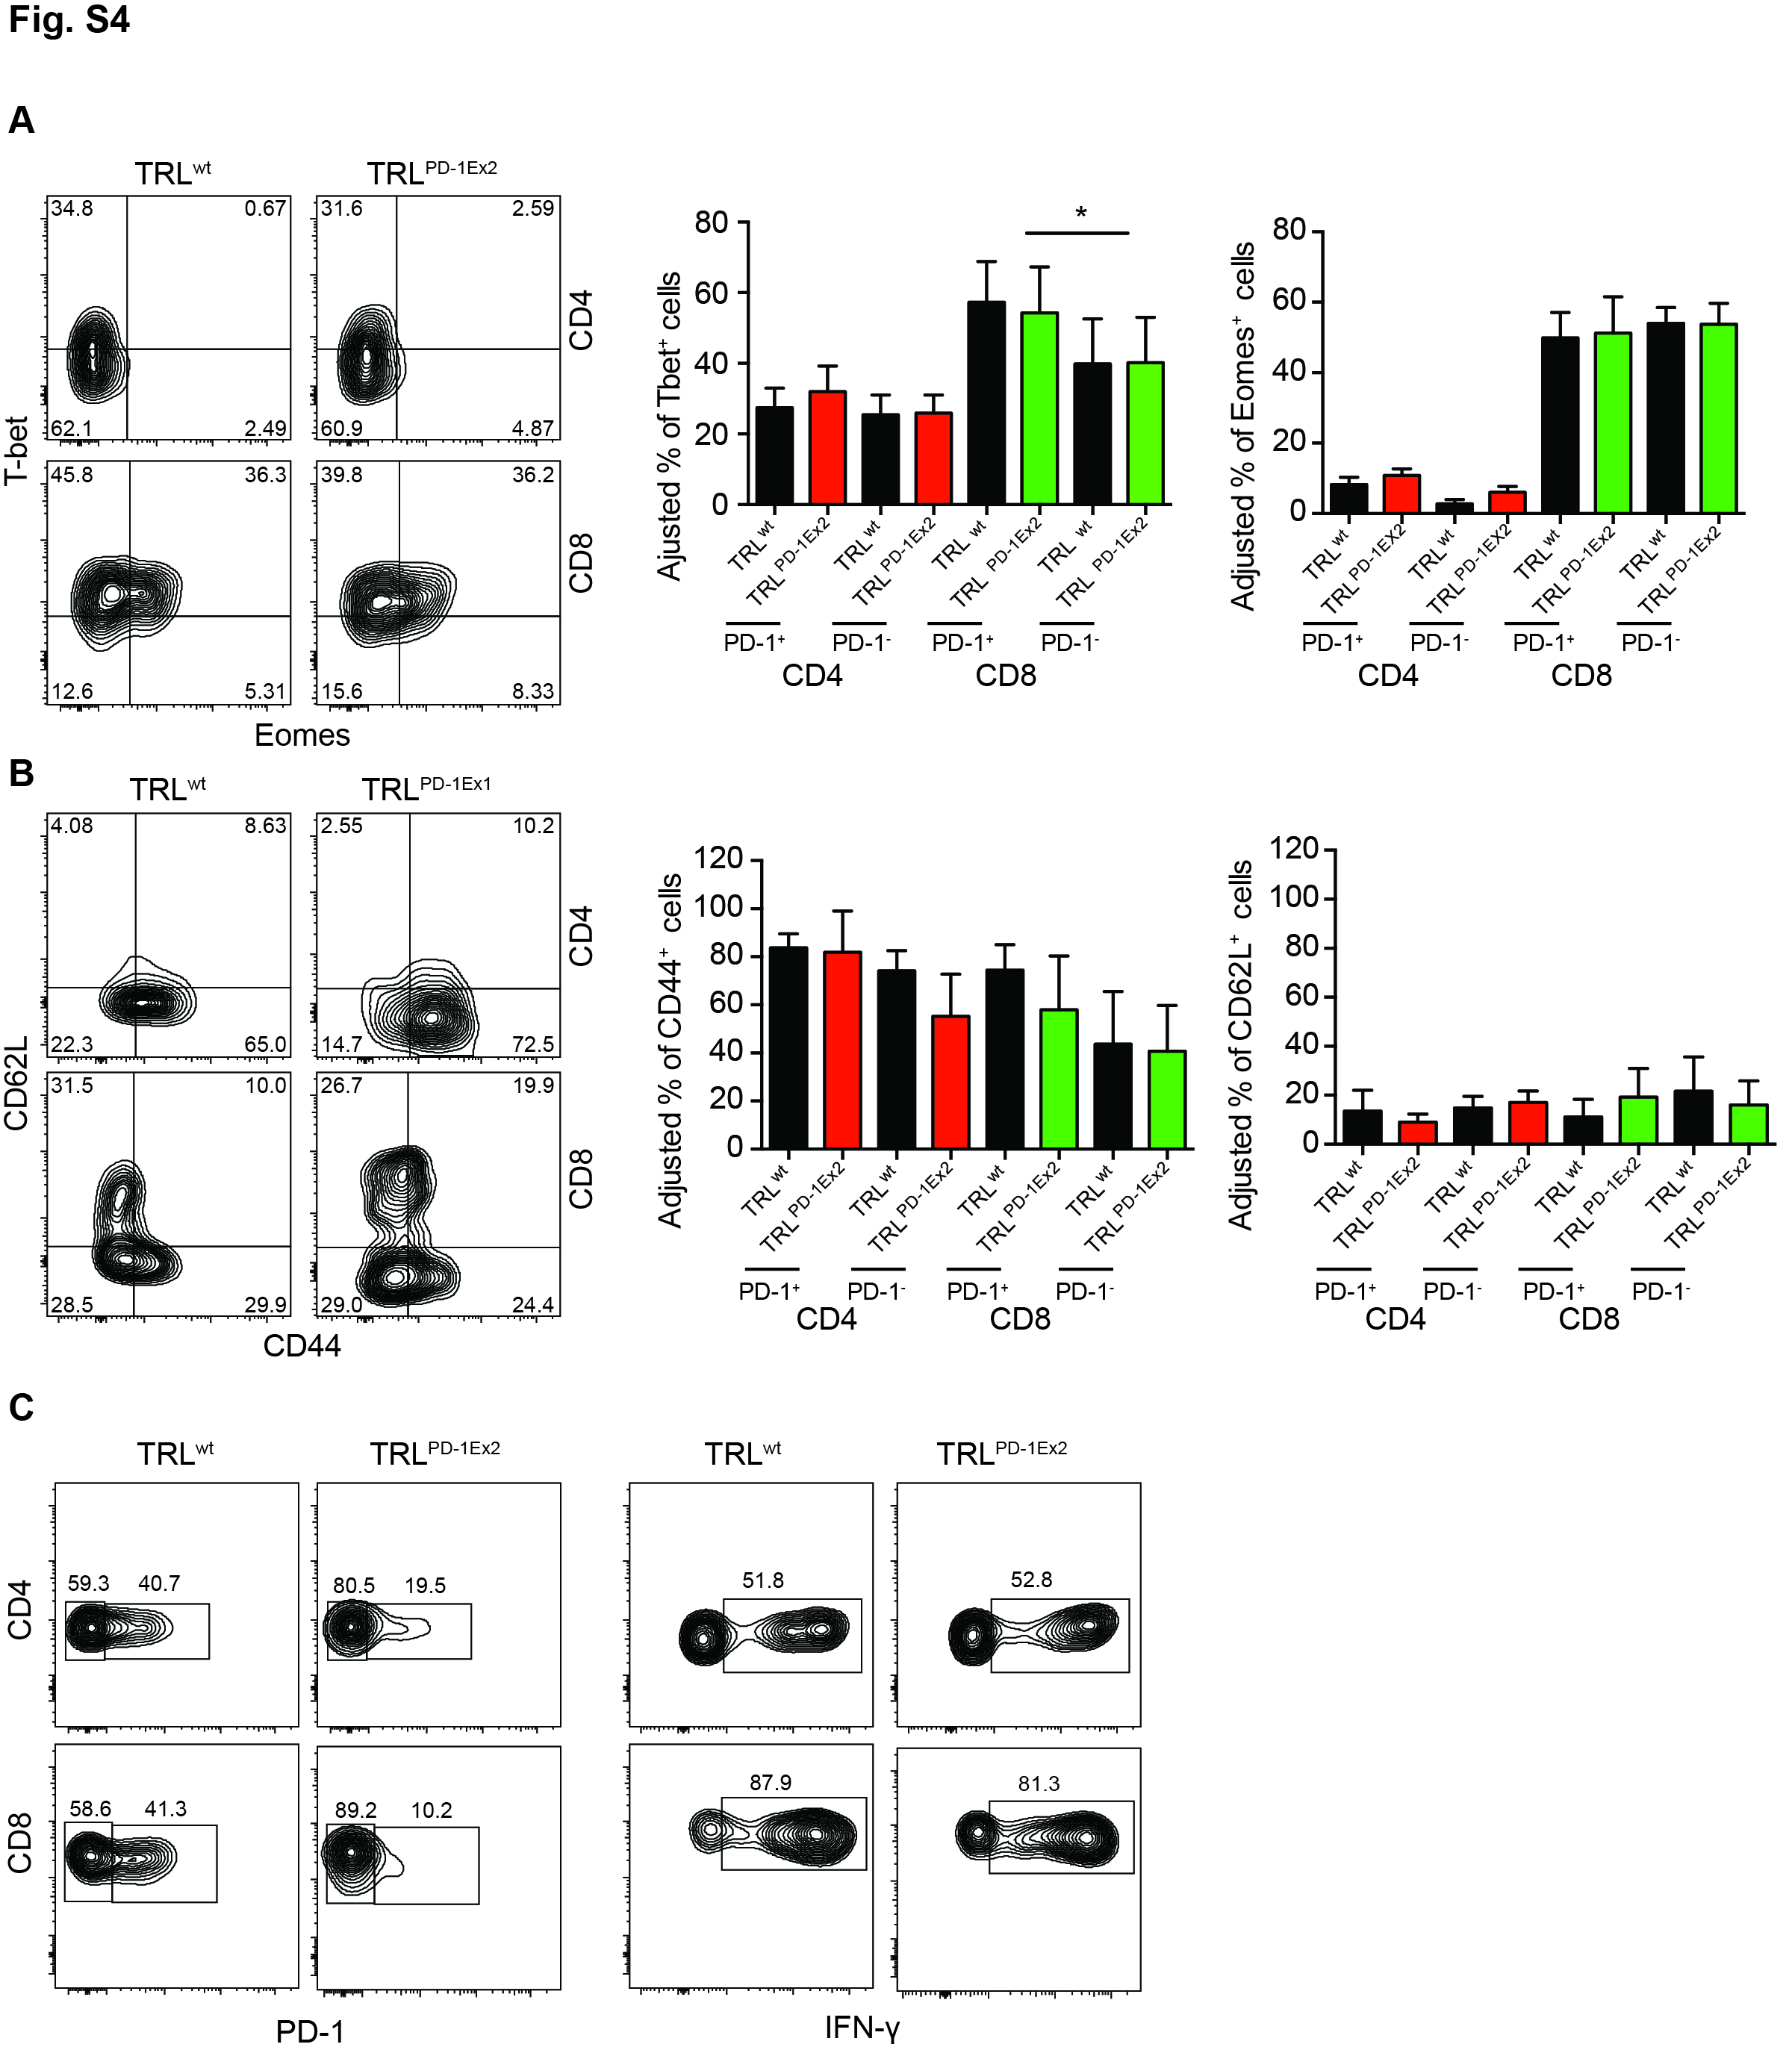

Supplement: 00085472can153352-sup-159331_1_supp_0_hbplfh.docx [file 00085472can153352-sup-159331_1_supp_0_hbplfh.docx]
